# Supplementary material for: Cooperation of the IFT-A complex with the IFT-B complex is required for ciliary retrograde protein trafficking and GPCR import
Source: PubMed Central journal article supplement — Mol Biol Cell. 2021 Jan 1;32(1):45–56. doi: 10.1091/mbc.E20-08-0556 (PMC8098818; doi:10.1091/mbc.e20-08-0556), 2021-01-01
Supplement: mbc-32-45-s001.pdf [file mbc-32-45-s001.pdf]

# Supplemental Materials

*Molecular Biology of the Cell*

Kobayashi *et al.*

Supplemental material

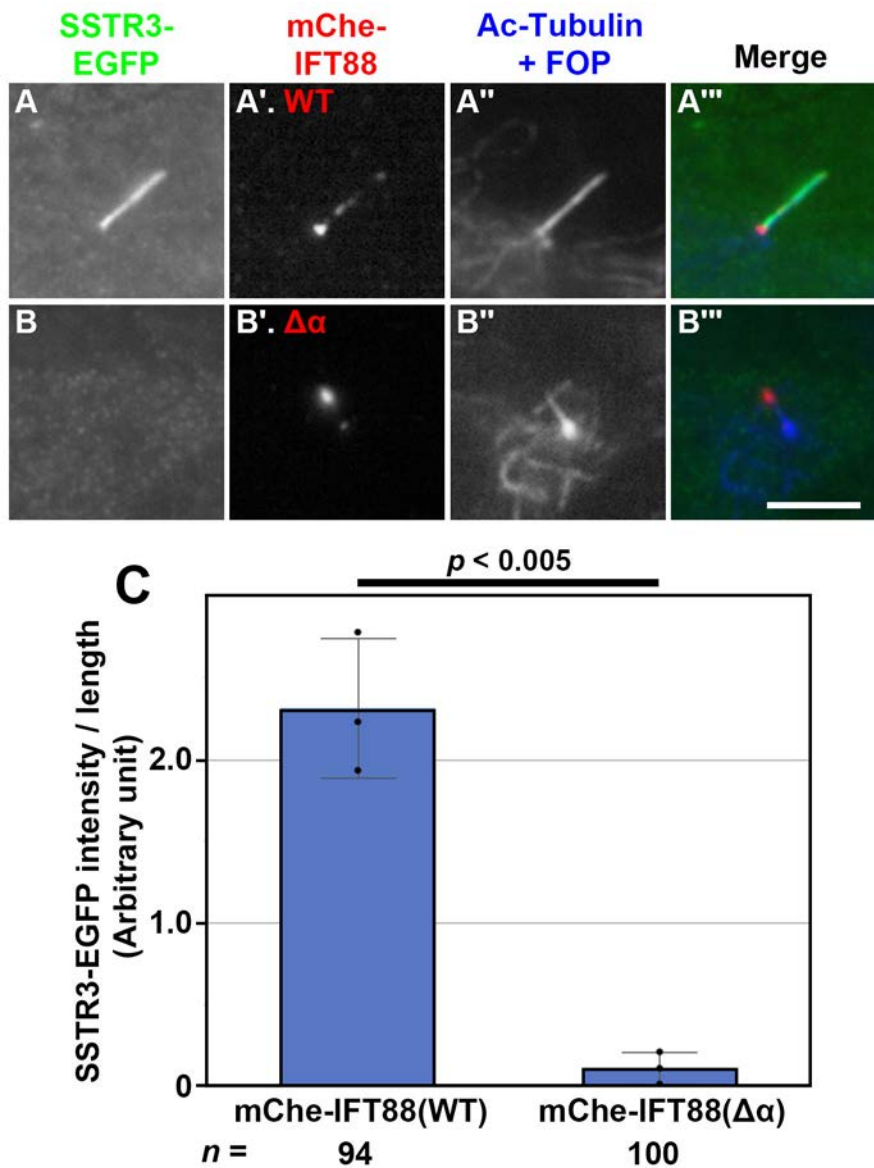

**Fig. S1. A defect in the ciliary localization of SSTR3 in IFT88( $\Delta\alpha$ )-expressing *IFT88*-KO cells**

SSTR3-EGFP was stably expressed in *IFT88*-KO cells stably expressing mChe-IFT88(WT) (A) or mChe-IFT88( $\Delta\alpha$ ) (B), by infection of a lentiviral vector. The cells were then immunostained for mChe (A', B') and Ac-tubulin and FOP (A'', B''). Scale bar, 5  $\mu$ m. (C) Ciliary SSTR3-EGFP intensities were measured, and the intensities per ciliary length are shown as a bar graph. Values are means  $\pm$  SD of three independent experiments. In each set of experiments, 30 to 36 ciliated cells were observed, and the total number of ciliated cells observed ( $n$ ) are shown. The  $p$ -value was determined by the Student  $t$ -test.

**Table S1. Plasmid vectors used in this study**

| Vector          | Insert                                  | Reference                      |
|-----------------|-----------------------------------------|--------------------------------|
| pTagRFP-T-N     | Human IFT20                             | Katoh <i>et al.</i> (2016)     |
| pTagRFP-T-C     | Human IFT22                             | Katoh <i>et al.</i> (2016)     |
| pTagRFP-T-C     | Human IFT25                             | Katoh <i>et al.</i> (2016)     |
| pTagRFP-T-C     | Human IFT27                             | Katoh <i>et al.</i> (2016)     |
| pTagRFP-T-C     | Human IFT38                             | Katoh <i>et al.</i> (2016)     |
| pCAG-EGFP-C     | Human IFT46                             | Katoh <i>et al.</i> (2016)     |
| pCAG-mCherry-C  | Human IFT46                             | Katoh <i>et al.</i> (2016)     |
| pCAG-EGFP-C     | Human IFT52                             | Katoh <i>et al.</i> (2016)     |
| pCAG-mCherry-C  | Human IFT52                             | Katoh <i>et al.</i> (2016)     |
| pTagRFP-T-C     | Human IFT54                             | Katoh <i>et al.</i> (2016)     |
| pCAG-mCherry-C  | Human IFT56                             | Funabashi <i>et al.</i> (2017) |
| pTagRFP-T-C     | Human IFT57                             | Katoh <i>et al.</i> (2016)     |
| pCAG2-mCherry-C | Human IFT70A                            | Takei <i>et al.</i> (2018)     |
| pCAG-EGFP-C     | Human IFT70B                            | Katoh <i>et al.</i> (2016)     |
| pCAG-mCherry-C  | Human IFT70B                            | Katoh <i>et al.</i> (2016)     |
| pCAG-mCherry-C  | Human IFT74                             | Katoh <i>et al.</i> (2016)     |
| pCAG2-mCherry-N | Human IFT80                             | This study                     |
| pCAG-mCherry-C  | Human IFT81                             | Katoh <i>et al.</i> (2016)     |
| pCAG2-EGFP-C    | Human IFT88                             | This study                     |
| pCAG2-mCherry-C | Human IFT88                             | This study                     |
| pCAG2-EGFP-C    | Human IFT88( $\Delta$ NT: 206–833)      | This study                     |
| pCAG2-mCherry-C | Human IFT88( $\Delta$ NT: 206–833)      | This study                     |
| pCAG2-EGFP-C    | Human IFT88( $\Delta$ CT: 1–696)        | This study                     |
| pCAG2-mCherry-C | Human IFT88( $\Delta$ CT: 1–696)        | This study                     |
| pCAG2-EGFP-C    | Human IFT88( $\Delta$ $\alpha$ : 1–805) | This study                     |
| pCAG2-mCherry-C | Human IFT88( $\Delta$ $\alpha$ : 1–805) | This study                     |
| pCAG-mCherry-C  | Human IFT172                            | Katoh <i>et al.</i> (2016)     |
| pEGFP-C1        | Human IFT43                             | Hirano <i>et al.</i> (2017)    |
| pmCherry-C1     | Human IFT43                             | Hirano <i>et al.</i> (2017)    |
| pCAG2-EGFP-C    | Human IFT121                            | Hirano <i>et al.</i> (2017)    |

|                      |                                      |                                |
|----------------------|--------------------------------------|--------------------------------|
| pCAG2-mCherry-C      | Human IFT121                         | Hirano <i>et al.</i> (2017)    |
| pCAG2-EGFP-C         | Human IFT122                         | Hirano <i>et al.</i> (2017)    |
| pCAG2-mCherry-C      | Human IFT122                         | Hirano <i>et al.</i> (2017)    |
| pCAG2-EGFP-C         | Human IFT139                         | Hirano <i>et al.</i> (2017)    |
| pCAG2-mCherry-C      | Human IFT139                         | Hirano <i>et al.</i> (2017)    |
| pCAG2-EGFP-C         | Human IFT140                         | Hirano <i>et al.</i> (2017)    |
| pCAG2-mCherry-C      | Human IFT140                         | Hirano <i>et al.</i> (2017)    |
| pCAG2-EGFP-C         | Human IFT144                         | Hirano <i>et al.</i> (2017)    |
| pCAG2-mCherry-C      | Human IFT144                         | Hirano <i>et al.</i> (2017)    |
| pEGFP-C1             | Human TULP3                          | Hirano <i>et al.</i> (2017)    |
| pCAG2-EGFP-C         | Human KIF3A                          | Funabashi <i>et al.</i> (2018) |
| pCAG2-EGFP-C         | Human KIF3B                          | Funabashi <i>et al.</i> (2018) |
| pCAG2-EGFP-C         | Human KAP3                           | Funabashi <i>et al.</i> (2018) |
| pEGFP-C1             | Human BBS2                           | Katoh <i>et al.</i> (2015)     |
| pCAG-mCherry-C       | Human BBS2                           | Nozaki <i>et al.</i> (2019)    |
| pRRLsinPPT-EGFP-C    | Human IFT88                          | This study                     |
| pRRLsinPPT-mCherry-C | Human IFT88                          | This study                     |
| pRRLsinPPT-mCherry-C | Human IFT88( $\Delta$ NT: 206–833)   | This study                     |
| pRRLsinPPT-mCherry-C | Human IFT88( $\Delta$ CT: 1–696)     | This study                     |
| pRRLsinPPT-EGFP-C    | Human IFT88( $\Delta\alpha$ : 1–805) | This study                     |
| pRRLsinPPT-mCherry-C | Human IFT88( $\Delta\alpha$ : 1–805) | This study                     |
| pRRLsinPPT-EGFP-N    | Mouse SSTR3                          | Hirano <i>et al.</i> (2017)    |
| pGEX-6P1             | GFP-nanobody                         | Katoh <i>et al.</i> (2015)     |

**Video S1. TIRF microscopy of *IFT88*-KO cells expressing mChe-IFT88(WT)**

**Video S2. TIRF microscopy of control RPE1 cells expressing EGFP-IFT88(WT)**

**Video S3. TIRF microscopy of *IFT88*-KO cells expressing mChe-IFT88( $\Delta\alpha$ )**

**Video S4. TIRF microscopy of *IFT144*-KO cells expressing EGFP-IFT88(WT)**

**Video S5. ECV formation from *IFT88*-KO cells expressing EGFP-IFT88( $\Delta\alpha$ )**

### **Supplemental references**

Funabashi, T., Katoh, Y., Michisaka, S., Terada, M., Sugawa, M., and Nakayama, K. (2017). Ciliary entry of KIF17 is dependent on its binding to the IFT-B complex via IFT46-IFT56 as well as on its nuclear localization signal. *Mol. Biol. Cell* 28, 624-633.

Funabashi, T., Katoh, Y., Okazaki, M., Sugawa, M., and Nakayama, K. (2018). Interaction of heterotrimeric kinesin-II with IFT-B-connecting tetramer is crucial for ciliogenesis. *J. Cell Biol.* 217, 2867-2876.

Hirano, T., Katoh, Y., and Nakayama, K. (2017). Intraflagellar transport-A complex mediates ciliary entry as well as retrograde trafficking of ciliary G protein-coupled receptors. *Mol. Biol. Cell* 28, 429-439.

Katoh, Y., Nozaki, S., Hartanto, D., Miyano, R., and Nakayama, K. (2015). Architectures of multisubunit complexes revealed by a visible immunoprecipitation assay using fluorescent fusion proteins. *J. Cell Sci.* 128, 2351-2362.

Katoh, Y., Terada, M., Nishijima, Y., Takei, R., Nozaki, S., Hamada, H., and Nakayama, K. (2016). Overall architecture of the intraflagellar transport (IFT)-B complex containing Cluap1/IFT38 as an essential component of the IFT-B peripheral subcomplex. *J. Biol. Chem.* 291, 10962-10975.

Nozaki, S., Castro Araya, R.F., Katoh, Y., and Nakayama, K. (2019). Requirement of IFT-B-BBSome complex interaction in export of GPR161 from cilia. *Biol. Open* 8, bio043786.

Takei, R., Katoh, Y., and Nakayama, K. (2018). Robust interaction of IFT70 with IFT52-IFT88 in the IFT-B complex is required for ciliogenesis. *Biol. Open* 7, bio033241.
